# Supplementary material for: Variations in O-Glycosylation Patterns Influence Viral Pathogenicity, Infectivity, and Transmissibility in SARS-CoV-2 Variants
Source: MDPI journal article supplement (doi:10.3390/biom13101467), 2023-09-29

## **Supplementary Information**

### **Variations in *O*-glycosylation Patterns Influence Viral Pathogenicity, Infectivity, and Transmissibility in SARS-CoV-2 Variants**

Sherifdeen Onigbinde <sup>1</sup>‡, Cristian D. Gutierrez Reyes <sup>1</sup>‡, Mojibola Fowowe <sup>1</sup>, Oluwatosin  
Daramola <sup>1</sup>, Mojgan Atashi <sup>1</sup>, Andrew I. Bennett <sup>1</sup>, and Yehia Mechref <sup>1,\*</sup>

<sup>1</sup>Department of Chemistry and Biochemistry, Texas Tech University, Lubbock, TX 79409-1061

‡ These authors contribute equally

#### **\*Corresponding Author**

Department of Chemistry and Biochemistry

Texas Tech University

Lubbock, TX 79409-1061

Email: Yehia.Mechref@ttu.edu

Tel: 806-742-3059

Fax: 806-742-1289

## **Table of Contents:**

### **Supplementary Figures:**

**Supplementary Figure S1.** Amino acid sequences and purity of the acquired S1 glycoproteins of eleven strains of SARS-CoV-2 that were expressed in human embryonic kidney 293 (HEK293) cells.

**Supplementary Figure S2.** Sialylation relative abundance on the receptor binding domain (RBD) of the variants S1 glycoproteins.

**Supplementary Figure S3.** Sialylation relative abundance on the receptor binding motif (RBM) of the variants S1 glycoproteins.

**Supplementary Figure S4.** Heatmap showing the relative abundance of individual *O*-glycoforms identified in **alpha**.

**Supplementary Figure S5.** Heatmap showing the relative abundance of individual *O*-glycoforms identified in **beta**.

**Supplementary Figure S6.** Heatmap showing the relative abundance of individual *O*-glycoforms identified in **gamma**.

**Supplementary Figure S7.** Heatmap showing the relative abundance of individual *O*-glycoforms identified in **delta**.

**Supplementary Figure S8.** Heatmap showing the relative abundance of individual *O*-glycoforms identified in **epsilon**.

**Supplementary Figure S9.** Heatmap showing the relative abundance of individual *O*-glycoforms identified in **kappa**.

**Supplementary Figure S10.** Heatmap showing the relative abundance of individual *O*-glycoforms identified in **iota**.

**Supplementary Figure S11.** Heatmap showing the relative abundance of individual *O*-glycoforms identified in **eta**.

**Supplementary Figure S12.** Heatmap showing the relative abundance of individual *O*-glycoforms identified in **lambda**.

**Supplementary Figure S13.** Heatmap showing the relative abundance of individual *O*-glycoforms identified in **mu**.

**Supplementary Figure S14.** Heatmap showing the relative abundance of individual *O*-glycoforms identified in **omicron**.

**Supplementary Figure S15.** EThcD tandem mass spectra of a tryptic/IMPa digested glycopeptide confirming the occupancy of both T323 and S325 *O*-glycosylation sites. Data extracted from eta variant (H29) with **Scan no., 3354; m/z, 751.6761; z, 3**.

**Supplementary Figure S16.** EThcD tandem mass spectra of a tryptic/IMPa digested glycopeptide confirming the occupancy of a mutation point (R190S) in Gamma.

**Supplementary Tables:**

**Supplementary Table S1:** List of *O*-glycopeptides identified in the different variants by Byonic software.

**Supplementary Table S2:** List of *O*-glycopeptides identified in the different variants by MetaMorpheus software.

**Supplementary Table S3:** Venn plot results showing the list of *O*-glycopeptides common and unique to Iota, Eta, Lambda, Mu, and Omicron.

**Supplementary Table S4:** List of *O*-glycopeptides on G446S mutation in Omicron.

Supplementary Figure S1

|         |                                                                                                                |
|---------|----------------------------------------------------------------------------------------------------------------|
| 1       | 100                                                                                                            |
| Alpha   | MFVFLVLLPL VSSQCVNLT RTQLPPAYTN SFRGVVYPD KVRSSVLHS TQDLFLPFFS NVTWFHAI-- SGTNGTKRFD NPVLPFNDGV YFASTEKSNI     |
| Beta    | MFVFLVLLPL VSSQCVNFTT RTQLPPAYTN SFRGVVYPD KVRSSVLHS TQDLFLPFFS NVTWFHAIHV SGTNGTKRFA NPVLPFNDGV YFASTEKSNI    |
| Gamma   | MFVFLVLLPL VSSQCVNFTN RTQLPSAYTN SFRGVVYPD KVRSSVLHS TQDLFLPFFS NVTWFHAIHV SGTNGTKRFD NPVLPFNDGV YFASTEKSNI    |
| Delta   | MFVFLVLLPL VSSQCVNLRT RTQLPPAYTN SFRGVVYPD KVRSSVLHS TQDLFLPFFS NVTWFHAIHV SGTNGTKRFD NPVLPFNDGV YFASTEKSNI    |
| Epsilon | MFVFLVLLPL VSSQCVNLT RTQLPPAYTN SFRGVVYPD KVRSSVLHS TQDLFLPFFS NVTWFHAIHV SGTNGTKRFD NPVLPFNDGV YFASTEKSNI     |
| Kappa   | MFVFLVLLPL VSSQCVNLT RTQLPPAYTN SFRGVVYPD KVRSSVLHS TQDLFLPFFS NVTWFHAIHV SGTNGTKRFD NPVLPFNDGV YFASTEKSNI     |
| Iota    | MFVFLVLLPL VSSQCVNLT RTQLPPAYTN SFRGVVYPD KVRSSVLHS TQDLFLPFFS NVTWFHAIHV SGTNGTKRFD NPVLPFNDGV YFASTEKSNI     |
| Eta     | MFVFLVLLPL VSSQCVNLT RTQLPPAYTN SFRGVVYPD KVRSSVLHS TQDLFLPFFS NVTWFHAIHV SGTNGTKRFD NPVLPFNDGV YFASTEKSNI     |
| Lambda  | MFVFLVLLPL VSSQCVNLT RTQLPPAYTN SFRGVVYPD KVRSSVLHS TQDLFLPFFS NVTWFHAIHV SGTNVIKRFD NPVLPFNDGV YFASTEKSNI     |
| Mu      | MFVFLVLLPL VSSQCVNLT RTQLPPAYTN SFRGVVYPD KVRSSVLHS TQDLFLPFFS NVTWFHAIHV SGTNGTKRFD NPVLPFNDGV YFASTEKSNI     |
| Omicron | MFVFLVLLPL VSSQCVNLT RTQLPPAYTN SFRGVVYPD KVRSSVLHS TQDLFLPFFS NVTWFHAIHV SGTNGTKRFD NPVLPFNDGV YFASTEKSNI     |
| 101     | 200                                                                                                            |
| Alpha   | IRGWIFGTTL GSKTQSLIV NNATNVVIVK CEFQFCNDPF LGVYHKNNK SWMESEFRVY SSANNCTFEY VSQPFMLDLE GKQGNFKNLR EFVFNIDGY     |
| Beta    | IRGWIFGTTL GSKTQSLIV NNATNVVIVK CEFQFCNDPF LGVYHKNNK SWMESEFRVY SSANNCTFEY VSQPFMLDLE GKQGNFKNLR EFVFNIDGY     |
| Gamma   | IRGWIFGTTL GSKTQSLIV NNATNVVIVK CEFQFCNDPF LGVYHKNNK SWMESEFRVY SSANNCTFEY VSQPFMLDLE GKQGNFKNLS EFVFNIDGY     |
| Delta   | IRGWIFGTTL GSKTQSLIV NNATNVVIVK CEFQFCNDPF LGVYHKNNK SWMESG--VY SSANNCTFEY VSQPFMLDLE GKQGNFKNLR EFVFNIDGY     |
| Epsilon | IRGWIFGTTL GSKTQSLIV NNATNVVIVK CEFQFCNDPF LGVYHKNNK SCMESEFRVY SSANNCTFEY VSQPFMLDLE GKQGNFKNLR EFVFNIDGY     |
| Kappa   | IRGWIFGTTL GSKTQSLIV NNATNVVIVK CEFQFCNDPF LGVYHKNNK SWMKSEFRVY SSANNCTFEY VSQPFMLDLE GKQGNFKNLR EFVFNIDGY     |
| Iota    | IRGWIFGTTL GSKTQSLIV NNATNVVIVK CEFQFCNDPF LGVYHKNNK SWMESEFRVY SSANNCTFEY VSQPFMLDLE GKQGNFKNLR EFVFNIDGY     |
| Eta     | IRGWIFGTTL GSKTQSLIV NNATNVVIVK CEFQFCNDPF LGVYHKNNK SWMESEFRVY SSANNCTFEY VSQPFMLDLE GKQGNFKNLR EFVFNIDGY     |
| Lambda  | IRGWIFGTTL GSKTQSLIV NNATNVVIVK CEFQFCNDPF LGVYHKNNK SWMESEFRVY SSANNCTFEY VSQPFMLDLE GKQGNFKNLR EFVFNIDGY     |
| Mu      | IRGWIFGTTL GSKTQSLIV NNATNVVIVK CEFQFCNDPF LGVYHKNNK SWMESEFRVY SSANNCTFEY VSQPFMLDLE GKQGNFKNLR EFVFNIDGY     |
| Omicron | IRGWIFGTTL GSKTQSLIV NNATNVVIVK CEFQFCNDPF LDVYHKNNK SWMESEFRVY SSANNCTFEY VSQPFMLDLE GKQGNFKNLR EFVFNIDGY     |
| 201     | 300                                                                                                            |
| Alpha   | FKIYSKHTPI NLVRDLPOGF SALEPLVDLP IGINITRFQT LLALHRSYLT PGDSSSGWTA GAAAYVGYL QPRTFLLYN ENGTITDAVD CALDPLSETK    |
| Beta    | FKIYSKHTPI NLVRGLPOGF SALEPLVDLP IGINITRFQT L--HISYLT PGDSSSGWTA GAAAYVGYL QPRTFLLYN ENGTITDAVD CALDPLSETK     |
| Gamma   | FKIYSKHTPI NLVRDLPOGF SALEPLVDLP IGINITRFQT LLALHRSYLT PGDSSSGWTA GAAAYVGYL QPRTFLLYN ENGTITDAVD CALDPLSETK    |
| Delta   | FKIYSKHTPI NLVRDLPOGF SALEPLVDLP IGINITRFQT LLALHRSYLT PGDSSSGWTA GAAAYVGYL QPRTFLLYN ENGTITDAVD CALDPLSETK    |
| Epsilon | FKIYSKHTPI NLVRDLPOGF SALEPLVDLP IGINITRFQT LLALHRSYLT PGDSSSGWTA GAAAYVGYL QPRTFLLYN ENGTITDAVD CALDPLSETK    |
| Kappa   | FKIYSKHTPI NLVRDLPOGF SALEPLVDLP IGINITRFQT LLALHRSYLT PGDSSSGWTA GAAAYVGYL QPRTFLLYN ENGTITDAVD CALDPLSETK    |
| Iota    | FKIYSKHTPI NLVRDLPOGF SALEPLVDLP IGINITRFQT LLALHRSYLT PGSSSGWTA GAAAYVGYL QPRTFLLYN ENGTITDAVD CALDPLSETK     |
| Eta     | FKIYSKHTPI NLVRDLPOGF SALEPLVDLP IGINITRFQT LLALHRSYLT PGDSSSGWTA GAAAYVGYL QPRTFLLYN ENGTITDAVD CALDPLSETK    |
| Lambda  | FKIYSKHTPI NLVRDLPOGF SALEPLVDLP IGINITRFQT LLALHRSYLT PGSSSGWTA GAAAYVGYL QPRTFLLYN ENGTITDAVD CALDPLSETK     |
| Mu      | FKIYSKHTPI NLVRDLPOGF SALEPLVDLP IGINITRFQT LLALHRSYLT PGDSSSGWTA GAAAYVGYL QPRTFLLYN ENGTITDAVD CALDPLSETK    |
| Omicron | FKIYSKHTPI NLVRDLPOGF SALEPLVDLP IGINITRFQT LLALHRSYLT PGDSSSGWTA GAAAYVGYL QPRTFLLYN ENGTITDAVD CALDPLSETK    |
| 301     | 400                                                                                                            |
| Alpha   | CTLKSFTVEK GIYQTSNFRV QPTESIVRFP NITNLCPFGE VFNATRFASV YAWNKRKISN CVADYSVLYN SASFSTFKCY GVSPTKLNDL CFTNVYADSE  |
| Beta    | CTLKSFTVEK GIYQTSNFRV QPTESIVRFP NITNLCPFGE VFNATRFASV YAWNKRKISN CVADYSVLYN SASFSTFKCY GVSPTKLNDL CFTNVYADSE  |
| Gamma   | CTLKSFTVEK GIYQTSNFRV QPTESIVRFP NITNLCPFGE VFNATRFASV YAWNKRKISN CVADYSVLYN SASFSTFKCY GVSPTKLNDL CFTNVYADSE  |
| Delta   | CTLKSFTVEK GIYQTSNFRV QPTESIVRFP NITNLCPFGE VFNATRFASV YAWNKRKISN CVADYSVLYN SASFSTFKCY GVSPTKLNDL CFTNVYADSE  |
| Epsilon | CTLKSFTVEK GIYQTSNFRV QPTESIVRFP NITNLCPFGE VFNATRFASV YAWNKRKISN CVADYSVLYN SASFSTFKCY GVSPTKLNDL CFTNVYADSE  |
| Kappa   | CTLKSFTVEK GIYQTSNFRV QPTESIVRFP NITNLCPFGE VFNATRFASV YAWNKRKISN CVADYSVLYN SASFSTFKCY GVSPTKLNDL CFTNVYADSE  |
| Iota    | CTLKSFTVEK GIYQTSNFRV QPTESIVRFP NITNLCPFGE VFNATRFASV YAWNKRKISN CVADYSVLYN SASFSTFKCY GVSPTKLNDL CFTNVYADSE  |
| Eta     | CTLKSFTVEK GIYQTSNFRV QPTESIVRFP NITNLCPFGE VFNATRFASV YAWNKRKISN CVADYSVLYN SASFSTFKCY GVSPTKLNDL CFTNVYADSE  |
| Lambda  | CTLKSFTVEK GIYQTSNFRV QPTESIVRFP NITNLCPFGE VFNATRFASV YAWNKRKISN CVADYSVLYN SASFSTFKCY GVSPTKLNDL CFTNVYADSE  |
| Mu      | CTLKSFTVEK GIYQTSNFRV QPTESIVRFP NITNLCPFGE VFNATRFASV YAWNKRKISN CVADYSVLYN SASFSTFKCY GVSPTKLNDL CFTNVYADSE  |
| Omicron | CTLKSFTVEK GIYQTSNFRV QPTESIVRFP NITNLCPFGE VFNATRFASV YAWNKRKISN CVADYSVLYN LAFSTFKCY GVSPTKLNDL CFTNVYADSE   |
| 401     | 500                                                                                                            |
| Alpha   | VIRGDEVROQ APGQTGKIAD YNYKLDDFT GCVIAWNSNN LDSKVGGNYN YLYRLFRKSN LKPFERDIST EIYQAGSTPC NGVEGFNCYF PLOSYGFQPT   |
| Beta    | VIRGDEVROQ APGQTGNIAID YNYKLDDFT GCVIAWNSNN LDSKVGGNYN YLYRLFRKSN LKPFERDIST EIYQAGSTPC NGVKGFNCYF PLOSYGFQPT  |
| Gamma   | VIRGDEVROQ APGQTGTIAD YNYKLDDFT GCVIAWNSNN LDSKVGGNYN YLYRLFRKSN LKPFERDIST EIYQAGSTPC NGVKGFNCYF PLOSYGFQPT   |
| Delta   | VIRGDEVROQ APGQTGKIAD YNYKLDDFT GCVIAWNSNN LDSKVGGNYN YLYRLFRKSN LKPFERDIST EIYQAGSKPC NGVEGFNCYF PLOSYGFQPT   |
| Epsilon | VIRGDEVROQ APGQTGKIAD YNYKLDDFT GCVIAWNSNN LDSKVGGNYN YLYRLFRKSN LKPFERDIST EIYQAGSTPC NGVEGFNCYF PLOSYGFQPT   |
| Kappa   | VIRGDEVROQ APGQTGKIAD YNYKLDDFT GCVIAWNSNN LDSKVGGNYN YLYRLFRKSN LKPFERDIST EIYQAGSTPC NGVQGFNCYF PLOSYGFQPT   |
| Iota    | VIRGDEVROQ APGQTGKIAD YNYKLDDFT GCVIAWNSNN LDSKVGGNYN YLYRLFRKSN LKPFERDIST EIYQAGNTPC NGVKGFNCYF PLOSYGFQPT   |
| Eta     | VIRGDEVROQ APGQTGKIAD YNYKLDDFT GCVIAWNSNN LDSKVGGNYN YLYRLFRKSN LKPFERDIST EIYQAGSTPC NGVKGFNCYF PLOSYGFQPT   |
| Lambda  | VIRGDEVROQ APGQTGKIAD YNYKLDDFT GCVIAWNSNN LDSKVGGNYN YLYRLFRKSN LKPFERDIST EIYQAGSTPC NGVEGFNCYF PLOSYGFQPT   |
| Mu      | VIRGDEVROQ APGQTGKIAD YNYKLDDFT GCVIAWNSNN LDSKVGGNYN YLYRLFRKSN LKPFERDIST EIYQAGSTPC NGVKGFNCYF PLOSYGFQPT   |
| Omicron | VIRGDEVROQ APGQTGNIAID YNYKLDDFT GCVIAWNSNK LDSKVSGNYN YLYRLFRKSN LKPFERDIST EIYQAGNKPC NGVAGFNICYF PLRSYSFRPT |

501 600

Alpha YGVGYQPYRV VVLSFELLHA PATVCGPKKS TNLVKNKCVN FNFNGLTGTG VLTESNKKFL PFQQFGRDID DTTDAVRDPQ TLEILDITPC SFGGVSVITP  
Beta YGVGYQPYRV VVLSFELLHA PATVCGPKKS TNLVKNKCVN FNFNGLTGTG VLTESNKKFL PFQQFGRDIA DTTDAVRDPQ TLEILDITPC SFGGVSVITP Gamma  
YGVGYQPYRV VVLSFELLHA PATVCGPKKS TNLVKNKCVN FNFNGLTGTG VLTESNKKFL PFQQFGRDIA DTTDAVRDPQ TLEILDITPC SFGGVSVITP Delta  
NGVGYPYRV VVLSFELLHA PATVCGPKKS TNLVKNKCVN FNFNGLTGTG VLTESNKKFL PFQQFGRDIA DTTDAVRDPQ TLEILDITPC SFGGVSVITP Epsilon  
NGVGYPYRV VVLSFELLHA PATVCGPKKS TNLVKNKCVN FNFNGLTGTG VLTESNKKFL PFQQFGRDIA DTTDAVRDPQ TLEILDITPC SFGGVSVITP Kappa  
NGVGYPYRV VVLSFELLHA PATVCGPKKS TNLVKNKCVN FNFNGLTGTG VLTESNKKFL PFQQFGRDIA DTTDAVRDPQ TLEILDITPC SFGGVSVITP Iota  
NGVGYPYRV VVLSFELLHA PATVCGPKKS TNLVKNKCVN FNFNGLTGTG VLTESNKKFL PFQQFGRDIA DTTDAVRDPQ TLEILDITPC SFGGVSVITP Eta  
NGVGYPYRV VVLSFELLHA PATVCGPKKS TNLVKNKCVN FNFNGLTGTG VLTESNKKFL PFQQFGRDIA DTTDAVRDPQ TLEILDITPC SFGGVSVITP Lambda  
Mu YGVGYQPYRV VVLSFELLHA PATVCGPKKS TNLVKNKCVN FNFNGLTGTG VLTESNKKFL PFQQFGRDIA DTTDAVRDPQ TLEILDITPC SFGGVSVITP Omicron  
YGVGHQPYRV VVLSFELLHA PATVCGPKKS TNLVKNKCVN FNFNGLKGTG VLTESNKKFL PFQQFGRDIA DTTDAVRDPQ TLEILDITPC SFGGVSVITP

601 685

Alpha GTNTSNQVAV LYQGVNCTEV PVAIHADQLT PTWRVYSTGS NVFQTRAGCL IGAEHVNNSY ECDIPIGAGI CASYQTQTNH HRRAR  
Beta GTNTSNQVAV LYQGVNCTEV PVAIHADQLT PTWRVYSTGS NVFQTRAGCL IGAEHVNNSY ECDIPIGAGI CASYQTQTNH PRRAR  
Gamma GTNTSNQVAV LYQGVNCTEV PVAIHADQLT PTWRVYSTGS NVFQTRAGCL IGAEHVNNSY ECDIPIGAGI CASYQTQTNH PRRAR  
Delta GTNTSNQVAV LYQGVNCTEV PVAIHADQLT PTWRVYSTGS NVFQTRAGCL IGAEHVNNSY ECDIPIGAGI CASYQTQTNH HRRAR  
Epsilon GTNTSNQVAV LYQGVNCTEV PVAIHADQLT PTWRVYSTGS NVFQTRAGCL IGAEHVNNSY ECDIPIGAGI CASYQTQTNH PRRAR  
Kappa GTNTSNQVAV LYQGVNCTEV PVAIHADQLT PTWRVYSTGS NVFQTRAGCL IGAEHVNNSY ECDIPIGAGI CASYQTQTNH HRRAR  
Iota GTNTSNQVAV LYQGVNCTEV PVAIHADQLT PTWRVYSTGS NVFQTRAGCL IGAEHVNNSY ECDIPIGAGI CASYQTQTNH PRRAR  
Eta GTNTSNQVAV LYQGVNCTEV PVAIHADQLT PTWRVYSTGS NVFQTRAGCL IGAEHVNNSY ECDIPIGAGI CASYQTHTNH PRRAR  
Lambda GTNTSNQVAV LYQGVNCTEV PVAIHADQLT PTWRVYSTGS NVFQTRAGCL IGAEHVNNSY ECDIPIGAGI CASYQTQTNH PRRAR  
Mu GTNTSNQVAV LYQGVNCTEV PVAIHADQLT PTWRVYSTGS NVFQTRAGCL IGAEHVNNSY ECDIPIGAGI CASYQTQTNH HRRAR  
Omicron GTNTSNQVAV LYQGVNCTEV PVAIHADQLT PTWRVYSTGS NVFQTRAGCL IGAEHVNNSY ECDIPIGAGI CASYQTQTKS HRRAR

The percentage coverage for each protein determined by Proteome Discoverer is as follows: Alpha 87%; Beta 97%; Gamma 87%; Delta 89%; Epsilon 87%; Kappa 84%; Iota 86%; Eta 70%, Lambda 88%; Mu 85%; and omicron 91%.

\*Sections highlighted in yellow show the protein percent coverage

\*Amino acid residues in red font are substituted

\* “–” Represents deletions

\* “↓” Indicates the point of insertion

Supplementary Figure S2

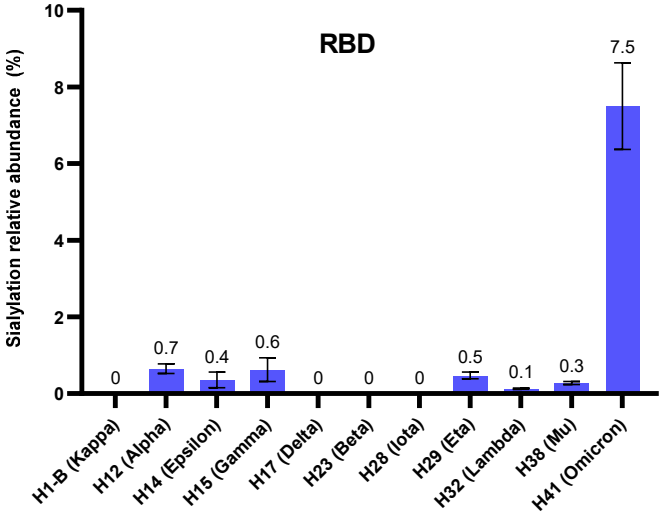

Supplementary Figure S3

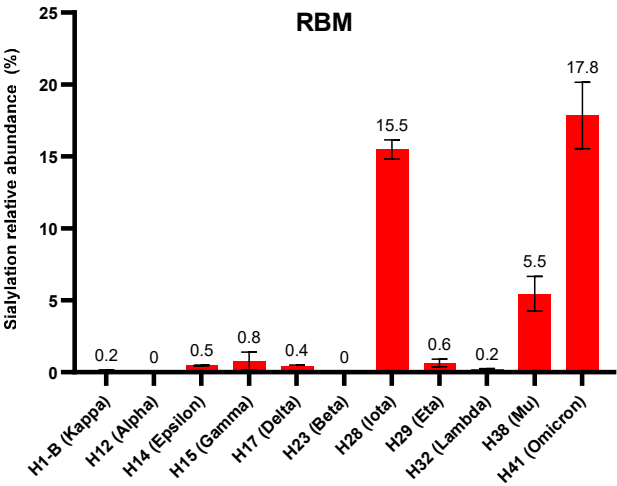



Supplementary Figure S4

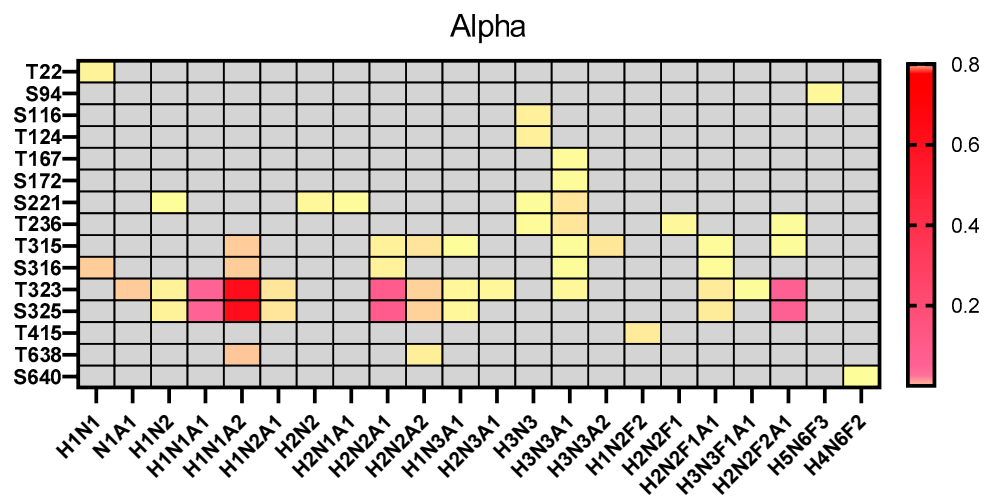

Supplementary Figure S5

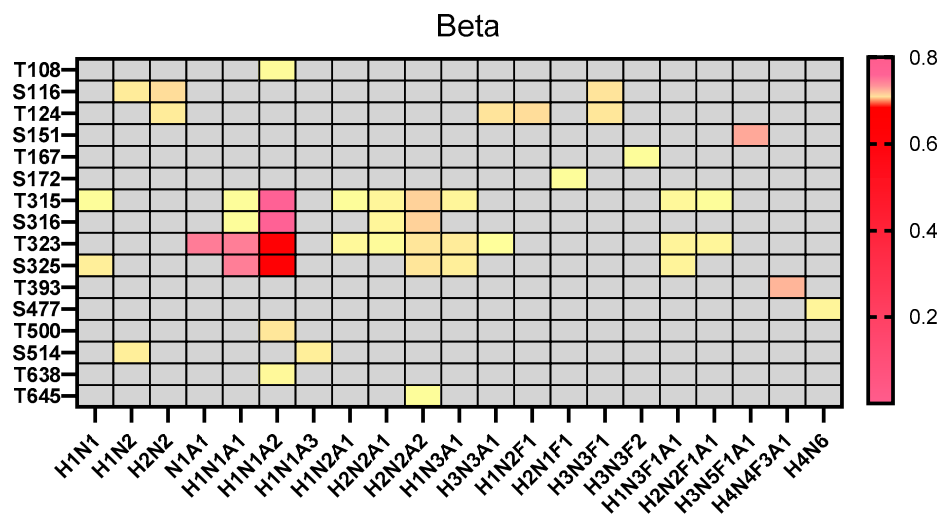

Supplementary Figure S6

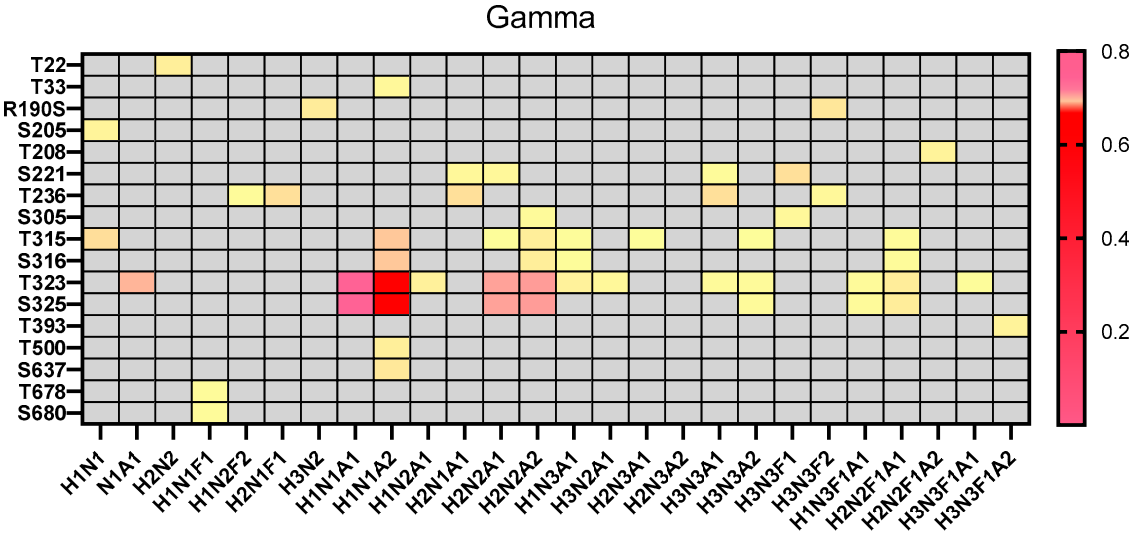

Supplementary Figure S7

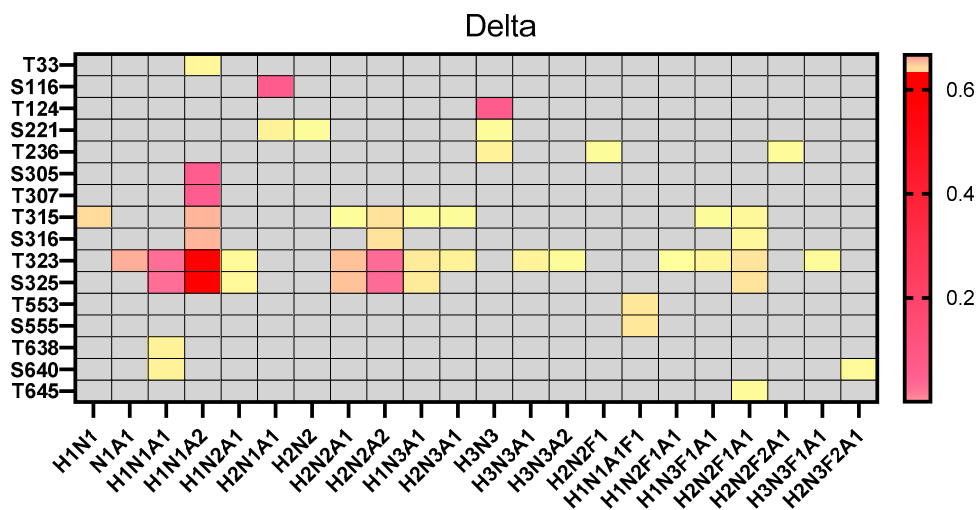

Supplementary Figure S8

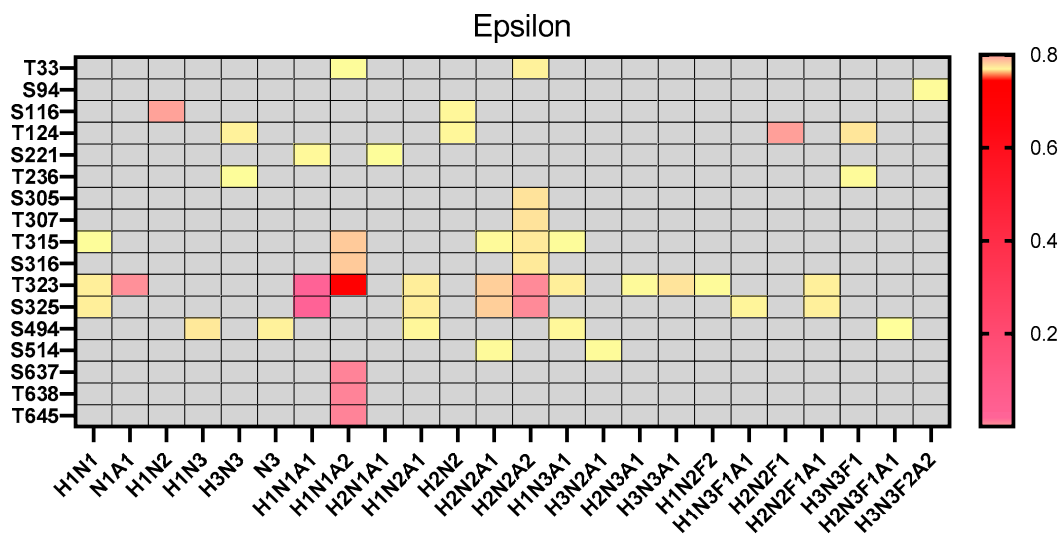

Supplementary Figure S9

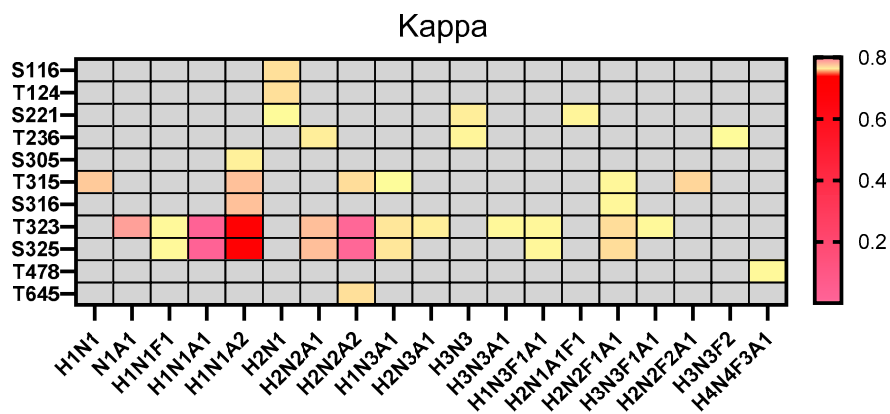

Supplementary Figure S10

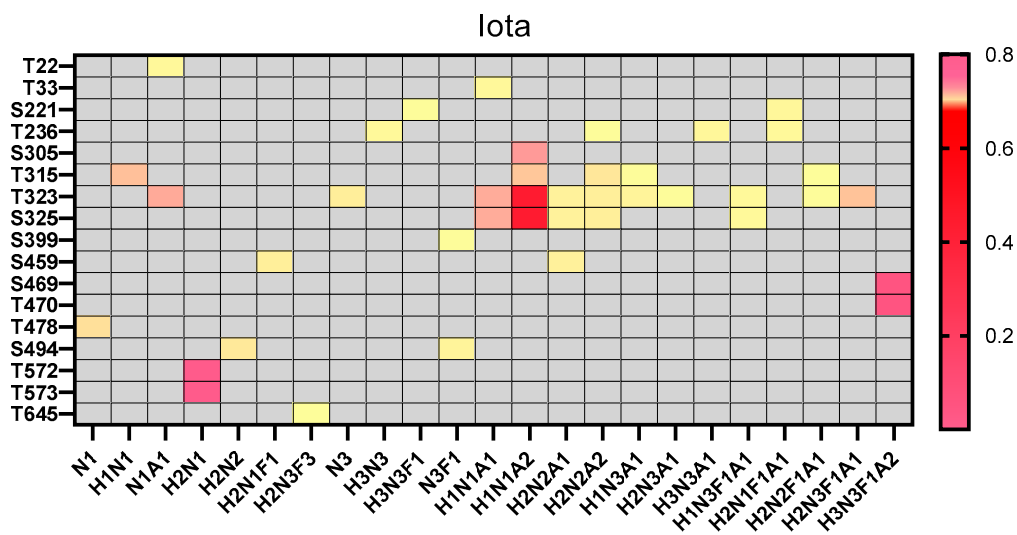

Supplementary Figure S11

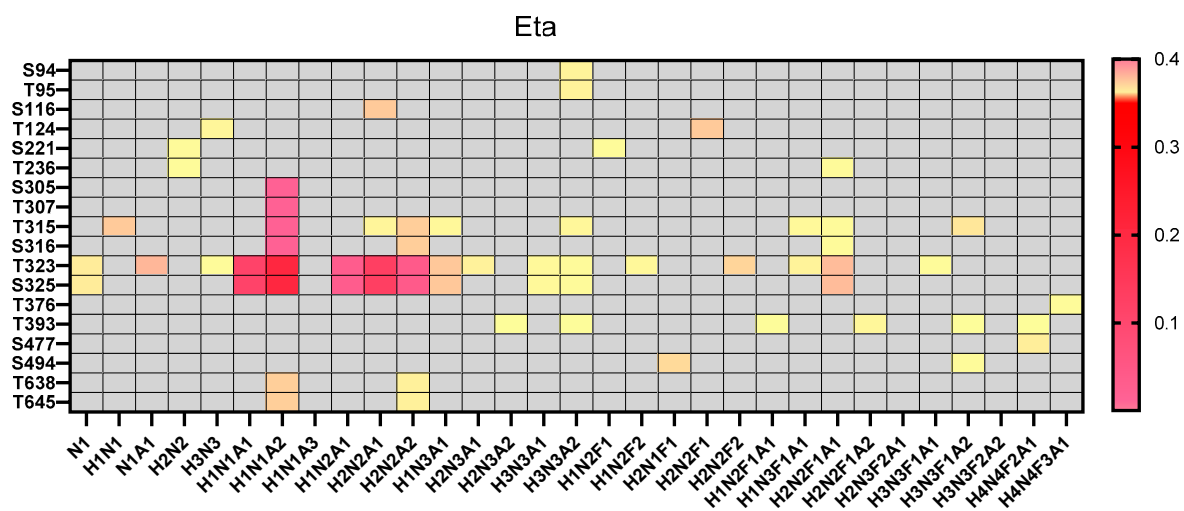



Supplementary Figure S12

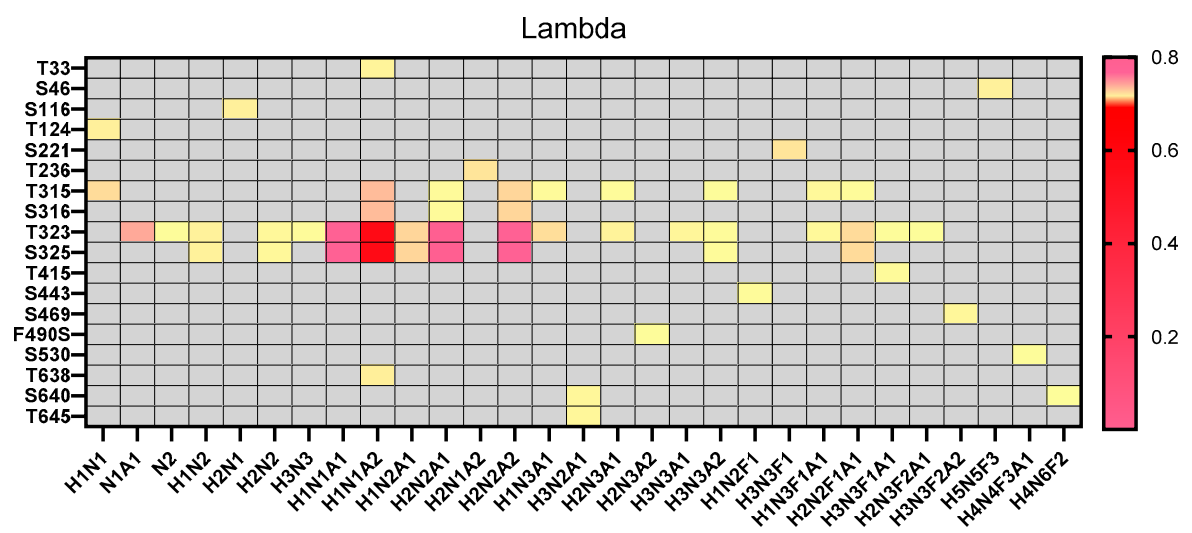

Supplementary Figure S13

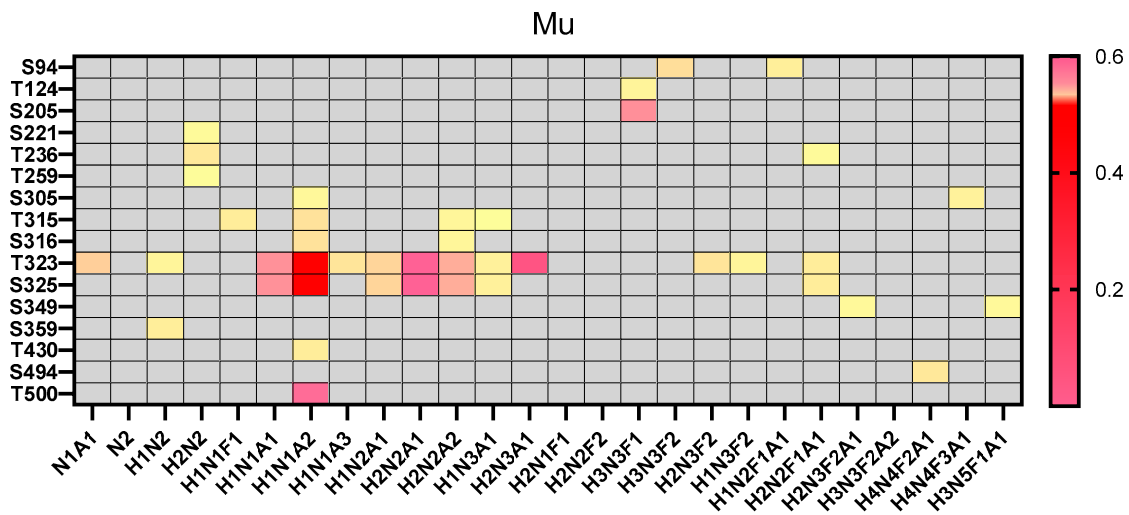

Supplementary Figure S14

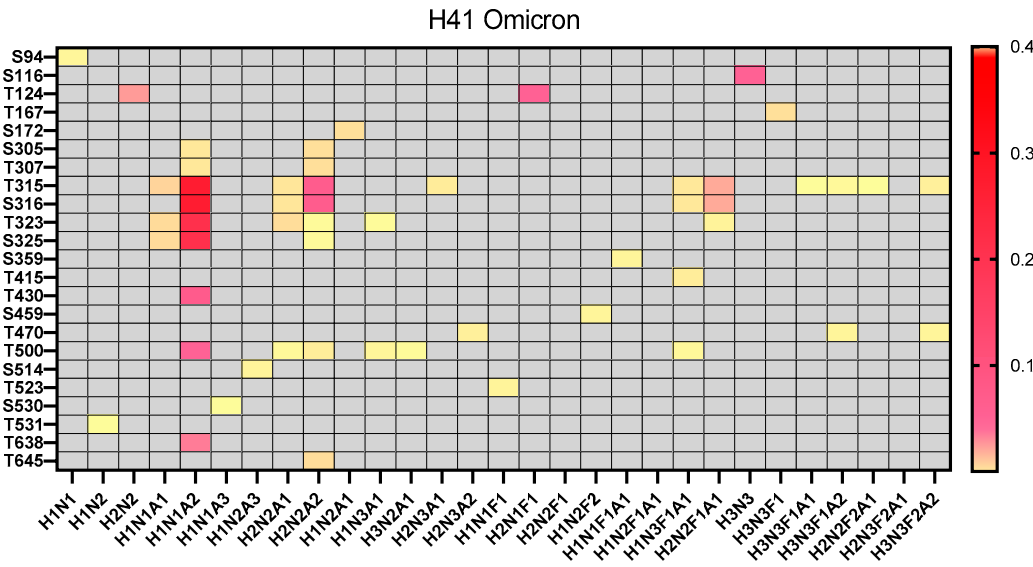

### Supplementary Figure S15

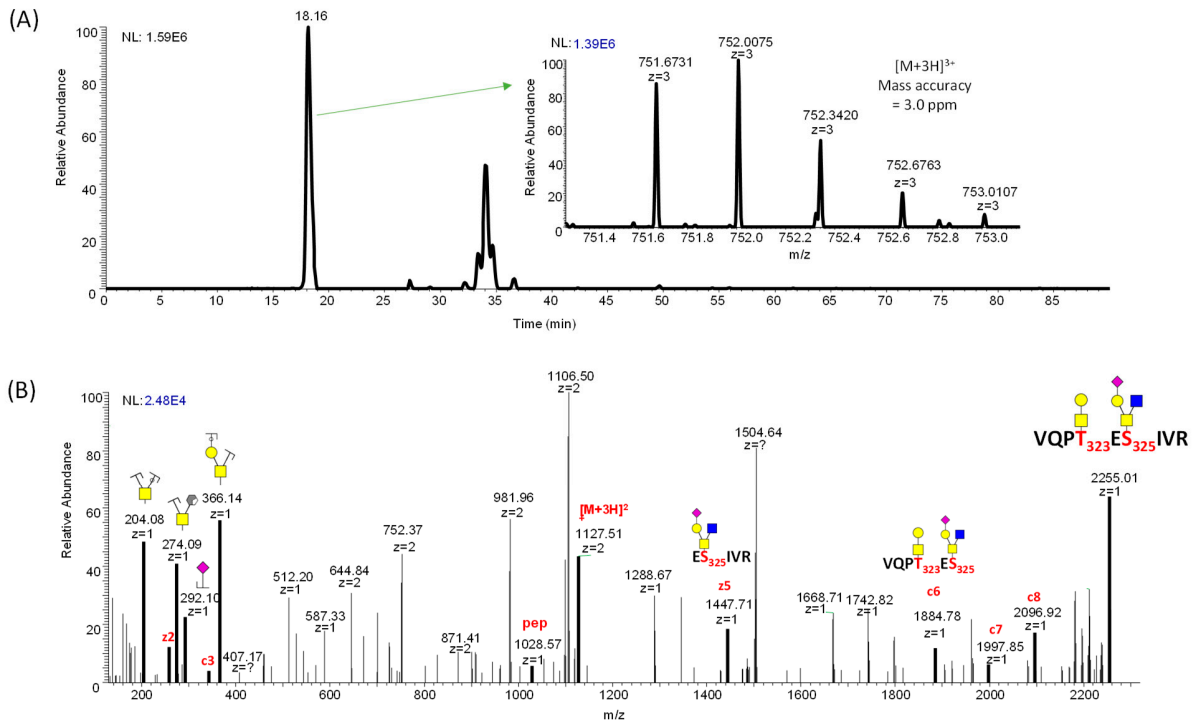

# Supplementary Figure S16

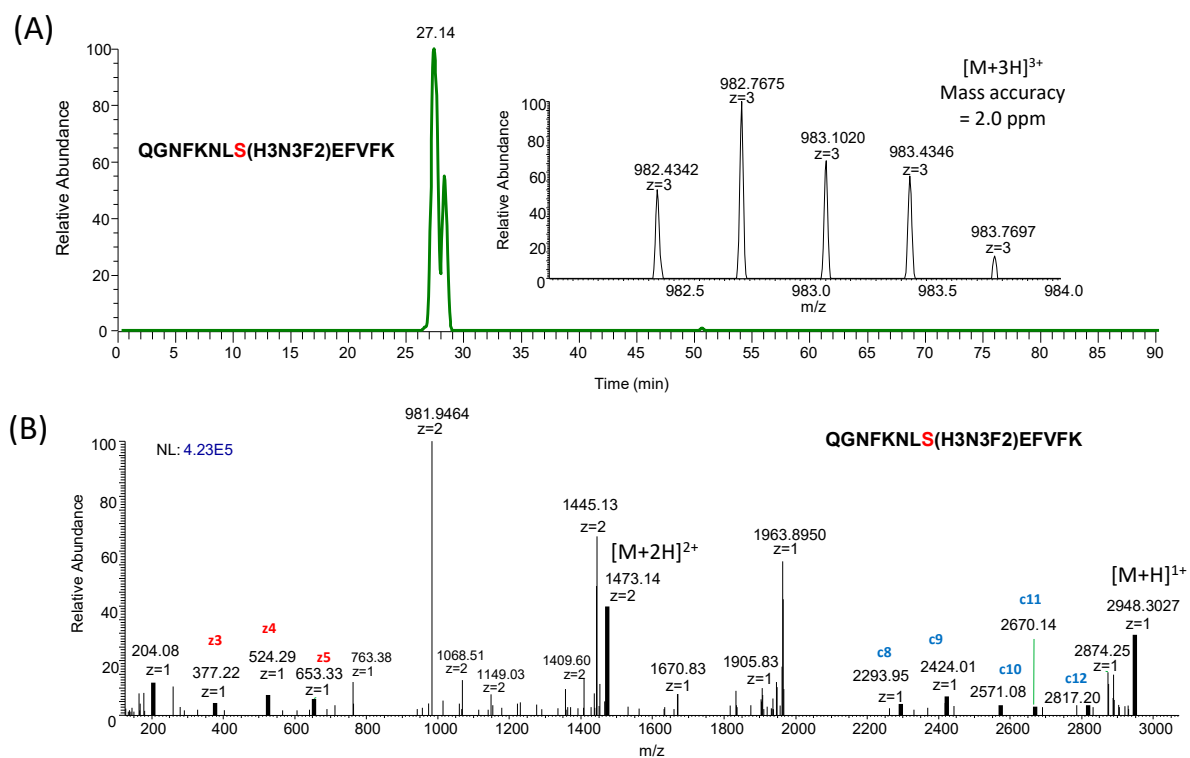

Supplement: s1 [file s1]
